# Supplementary material
Source: PubMed Central journal article supplement (PMC4854790)
Supplement: NIHMS760843-supplement-Supplemental_Material.pdf [file NIHMS760843-supplement-Supplemental_Material.pdf]

**Supplemental Material for Carignan et al., “Contribution of breast milk and formula to arsenic exposure during the first year of life in a US prospective cohort”**

Table of Contents

| <b>Item</b>                                                            | <b>Starting Page</b> |
|------------------------------------------------------------------------|----------------------|
| Appendix 1. Exposure model equations and inputs                        | S-2                  |
| Appendix 2. Supplemental tables and figures cited in the results       |                      |
| Table S1. Concentrations of arsenic in home tap water                  | S-3                  |
| Table S2. Formula ingestion rates for study subset                     | S-4                  |
| Table S3. Number of breast feedings per day for study subset           | S-5                  |
| Table S4. Comparison of body weight adjusted ingestion rates           | S-6                  |
| Table S5. Percentiles of arsenic exposure                              | S-7                  |
| Table S6. Sensitivity analysis – Geometric mean exposures              | S-9                  |
| Table S7. Sensitivity analysis – 95 <sup>th</sup> percentile exposures | S-11                 |
| Figure S1. Estimated arsenic exposure by feeding type and age          | S-13                 |
| References                                                             | S-14                 |

## APPENDIX 1 - EXPOSURE MODELS

### 1. Equations for estimated arsenic exposure via breast milk and formula for NHBCS infants, by feeding type

Formula-fed (consume only formula, no breast milk):

$$AsE_F = IR_{BW} \times (C_W + C_P)$$

Breastfed (consume only breast milk, no formula):

$$AsE_B = IR_{BW} \times (C_B)$$

Mixed formula and breast milk (assuming a 50/50 mix of these diet items):

$$AsE_M = [(IR_{BW} \div 2) \times (C_W + C_P)] + [(IR_{BW} \div 2) \times C_B]$$

where:

AsE = Arsenic exposure; subscript indicates feeding mode (F=Formula-Fed,

B=Breastfed, and M=mixed)

$IR_{BW}$  = Age specific, average body weight-adjusted ingestion rate<sup>1</sup>,  $L\ kg^{-1}\ d^{-1}$

$C_W$  = NHBCS subject-specific concentration of arsenic in home tap water,  $\mu g/L$

$C_P$  = Median or maximum concentration of arsenic in formula powder<sup>2</sup>,  $\mu g/L$

$C_B$  = Median or maximum concentration of arsenic in breast milk<sup>3</sup>,  $\mu g/L$

**APPENDIX 2. SUPPLEMENTAL TABLES & FIGURES CITED IN RESULTS**

**Table S1.** Concentrations of arsenic in home tap water ( $\mu\text{g/L}$ ) among our study subset ( $n=356$ ), based on samples taken at enrollment.

|                                       | n   | Minimum <sup>a</sup> | 5 <sup>th</sup><br>percentile | 25 <sup>th</sup><br>percentile | 50 <sup>th</sup><br>percentile | 75 <sup>th</sup><br>percentile | 95 <sup>th</sup><br>percentile | Maximum |
|---------------------------------------|-----|----------------------|-------------------------------|--------------------------------|--------------------------------|--------------------------------|--------------------------------|---------|
| <i>All feeding types</i>              | 356 | <LOD                 | 0.014                         | 0.079                          | 0.48                           | 3.22                           | 24.7                           | 79.7    |
| <i>Formula-Fed</i>                    |     |                      |                               |                                |                                |                                |                                |         |
| 4 months                              | 112 | <LOD                 | 0.010                         | 0.070                          | 0.31                           | 2.65                           | 26.7                           | 79.7    |
| 8 months                              | 179 | <LOD                 | 0.010                         | 0.090                          | 0.48                           | 3.33                           | 26.7                           | 79.7    |
| 12 months                             | 235 | <LOD                 | 0.011                         | 0.092                          | 0.51                           | 3.49                           | 24.7                           | 79.7    |
| <i>Mix of Formula and Breast Milk</i> |     |                      |                               |                                |                                |                                |                                |         |
| 4 months                              | 85  | <LOD                 | 0.014                         | 0.149                          | 1.21                           | 5.29                           | 54.7                           | 63.4    |
| 8 months                              | 58  | <LOD                 | 0.014                         | 0.080                          | 0.86                           | 5.41                           | 33.0                           | 57.0    |
| 12 months                             | 48  | <LOD                 | 0.014                         | 0.053                          | 0.44                           | 2.65                           | 18.8                           | 33.0    |
| <i>Breast Fed</i>                     |     |                      |                               |                                |                                |                                |                                |         |
| 4 months                              | 159 | <LOD                 | 0.015                         | 0.070                          | 0.48                           | 2.57                           | 18.8                           | 70.8    |
| 8 months                              | 119 | <LOD                 | 0.014                         | 0.070                          | 0.45                           | 2.57                           | 18.3                           | 70.8    |
| 12 months                             | 73  | <LOD                 | 0.014                         | 0.064                          | 0.79                           | 2.57                           | 30.4                           | 70.8    |

<sup>a</sup> <LOD = less than the limit of detection

**Table S2.** Formula ingestion rates (L/d) for our study subset (n=356) at select time points during the first year of life, as reported by parents during our telephone questionnaire.

|                                                             | n   | Minimum | 5 <sup>th</sup><br>percentile | 25 <sup>th</sup><br>percentile | 50 <sup>th</sup><br>percentile | 75 <sup>th</sup><br>percentile | 95 <sup>th</sup><br>percentile | Maximum | Mean | StdDev |
|-------------------------------------------------------------|-----|---------|-------------------------------|--------------------------------|--------------------------------|--------------------------------|--------------------------------|---------|------|--------|
| <i>FORMULA-FED</i>                                          |     |         |                               |                                |                                |                                |                                |         |      |        |
| 4 months                                                    | 111 | 0.15    | 0.53                          | 0.71                           | 0.83                           | 0.95                           | 1.18                           | 1.77    | 0.84 | 0.22   |
| 8 months                                                    | 178 | 0.12    | 0.30                          | 0.71                           | 0.83                           | 0.95                           | 1.18                           | 1.36    | 0.81 | 0.22   |
| 12 months                                                   | 233 | 0.06    | 0.30                          | 0.53                           | 0.71                           | 0.83                           | 1.07                           | 2.13    | 0.71 | 0.26   |
| <i>MIXED FEEDING: Received both formula and breast milk</i> |     |         |                               |                                |                                |                                |                                |         |      |        |
| 4 months                                                    | 85  | 0.030   | 0.03                          | 0.12                           | 0.24                           | 0.47                           | 1.07                           | 1.18    | 0.34 | 0.32   |
| 8 months                                                    | 58  | 0.030   | 0.06                          | 0.18                           | 0.24                           | 0.65                           | 0.95                           | 1.18    | 0.34 | 0.30   |
| 12 months                                                   | 48  | 0.030   | 0.06                          | 0.12                           | 0.24                           | 0.36                           | 0.71                           | 0.71    | 0.28 | 0.20   |

**Table S3.** Number of breast-feedings per day for our study subset (n=356) at select time points during the first year of life, as reported by parents during our telephone questionnaire.

|                                                             | n   | Minimum | 5 <sup>th</sup><br>percentile | 25 <sup>th</sup><br>percentile | 50 <sup>th</sup><br>percentile | 75 <sup>th</sup><br>percentile | 95 <sup>th</sup><br>percentile | Maximum | Mean | StdDev |
|-------------------------------------------------------------|-----|---------|-------------------------------|--------------------------------|--------------------------------|--------------------------------|--------------------------------|---------|------|--------|
| <i>BREASTFED</i>                                            |     |         |                               |                                |                                |                                |                                |         |      |        |
| 4 months                                                    | 156 | 2       | 4                             | 6                              | 8                              | 8                              | 10                             | 15      | 7.2  | 1.9    |
| 8 months                                                    | 119 | 2       | 3                             | 5                              | 5                              | 7                              | 8                              | 12      | 5.6  | 1.7    |
| 12 months                                                   | 73  | 1       | 1                             | 3                              | 4                              | 5                              | 8                              | 8       | 4.2  | 1.7    |
| <i>MIXED FEEDING: Received both formula and breast milk</i> |     |         |                               |                                |                                |                                |                                |         |      |        |
| 4 months                                                    | 85  | 1       | 1                             | 4                              | 6                              | 8                              | 10                             | 12      | 5.8  | 2.7    |
| 8 months                                                    | 57  | 1       | 1                             | 2                              | 4                              | 6                              | 8                              | 15      | 4.3  | 2.9    |
| 12 months                                                   | 48  | 1       | 1                             | 2                              | 3                              | 4                              | 10                             | 24      | 3.9  | 3.6    |

**Table S4.** Comparison of age-specific, body weight adjusted ingestion rates ( $IR_{BW}$ ,  $L\ kg^{-1}\ d^{-1}$ ) used in our sensitivity analyses.

| Model                       | Source                    | Feeding mode for which the $IR_{BW}$ was generated        | Age (months)                                                       |                    |                    |
|-----------------------------|---------------------------|-----------------------------------------------------------|--------------------------------------------------------------------|--------------------|--------------------|
|                             |                           |                                                           | 4                                                                  | 8                  | 12                 |
| Central Tendency Model      |                           |                                                           | Mean $IR_{BW}$ ( $L\ kg^{-1}\ day^{-1}$ )                          |                    |                    |
| Breast milk $IR_{BW}$       | EPA EFH (Table 15-4)      | Exclusively breastfed                                     | 0.112                                                              | 0.075              | 0.047              |
| Tap water $IR_{BW}$         | EPA EFH (Table 3-22)      | Formula plus direct and indirect consumption of tap water | 0.090                                                              | 0.063 <sup>a</sup> | 0.063 <sup>a</sup> |
| NHBCS $IR_{BW}$ for formula | NHBCS subset <sup>a</sup> | Exclusively formula-fed                                   | 0.127                                                              | 0.079              | 0.064              |
| Upper Bound Model           |                           |                                                           | Upper Percentile $IR_{BW}$ ( $L\ kg^{-1}\ day^{-1}$ ) <sup>b</sup> |                    |                    |
| Breast milk $IR_{BW}$       | EPA EFH (Table 15-4)      | Exclusively breastfed                                     | 0.148                                                              | 0.125              | 0.101              |
| Tap water $IR_{BW}$         | EPA EFH (Table 3-22)      | Formula plus direct and indirect consumption of tap water | 0.195                                                              | 0.152 <sup>a</sup> | 0.152 <sup>a</sup> |
| NHBCS $IR_{BW}$ for formula | NHBCS subset <sup>c</sup> | Exclusively formula-fed                                   | 0.197                                                              | 0.148              | 0.136              |

<sup>a</sup> Infants were grouped as 6 to <12 months of age

<sup>b</sup> Upper percentile values are based on the mean + 2 standard deviations.

<sup>c</sup> Subset of those infants with abstracted body weight data (ongoing effort): n=34 (4 months); n=48 (8 months); n=58 (12 months)

**Table S5.** Estimated exposure to arsenic ( $\mu\text{g kg}^{-1} \text{d}^{-1}$ ) among our study subset (n=356) during the first year of life via A) all feeding types and B) Mixed and Formula-fed feeding types using the central tendency model and upper bound model, which use central tendency or upper bound inputs, respectively, for the body-weight adjusted ingestion rate, arsenic in infant formula powder, and arsenic in breast milk. At the population-level, variability between infants is due to individual-level concentrations of arsenic in home tap water and the change in feeding type over time; however, there was no variability among Breastfed infants since only median and maximum values were modeled.

A)

|                               | All Feeding Types |                             |                             |                             |                             |         |
|-------------------------------|-------------------|-----------------------------|-----------------------------|-----------------------------|-----------------------------|---------|
|                               | Minimum           | 25 <sup>th</sup> percentile | 50 <sup>th</sup> percentile | 75 <sup>th</sup> percentile | 95 <sup>th</sup> percentile | Maximum |
| <b>Central Tendency Model</b> |                   |                             |                             |                             |                             |         |
| 4 months                      | 0.03              | 0.03                        | 0.09                        | 0.17                        | 1.62                        | 9.05    |
| 8 months                      | 0.02              | 0.02                        | 0.09                        | 0.16                        | 1.39                        | 6.06    |
| 12 months                     | 0.01              | 0.04                        | 0.06                        | 0.13                        | 0.88                        | 3.80    |
| <b>Upper Bound Model</b>      |                   |                             |                             |                             |                             |         |
| 4 months                      | 0.09              | 0.09                        | 0.19                        | 0.31                        | 2.24                        | 12.1    |
| 8 months                      | 0.08              | 0.08                        | 0.23                        | 0.36                        | 2.40                        | 10.2    |
| 12 months                     | 0.06              | 0.13                        | 0.20                        | 0.35                        | 1.96                        | 8.23    |

B)

|                               | Mixed Fed <sup>1</sup> |                  |                  |                  |                  |      | Formula Fed      |                  |                  |                  |       |      |
|-------------------------------|------------------------|------------------|------------------|------------------|------------------|------|------------------|------------------|------------------|------------------|-------|------|
|                               |                        | 25 <sup>th</sup> | 50 <sup>th</sup> | 75 <sup>th</sup> | 95 <sup>th</sup> |      | 25 <sup>th</sup> | 50 <sup>th</sup> | 75 <sup>th</sup> | 95 <sup>th</sup> |       |      |
|                               | Min                    | %tile            | %tile            | %tile            | %tile            | Max  | Min              | %tile            | %tile            | %tile            | %tile | Max  |
| <b>Central Tendency Model</b> |                        |                  |                  |                  |                  |      |                  |                  |                  |                  |       |      |
| 4 months                      | 0.08                   | 0.09             | 0.15             | 0.38             | 3.14             | 3.63 | 0.12             | 0.13             | 0.16             | 0.42             | 3.11  | 9.05 |
| 8 months                      | 0.05                   | 0.06             | 0.09             | 0.26             | 1.29             | 2.19 | 0.08             | 0.09             | 0.12             | 0.33             | 2.08  | 6.06 |
| 12 months                     | 0.03                   | 0.03             | 0.04             | 0.10             | 0.48             | 0.81 | 0.05             | 0.06             | 0.08             | 0.22             | 1.21  | 3.80 |
| <b>Upper Bound Model</b>      |                        |                  |                  |                  |                  |      |                  |                  |                  |                  |       |      |
| 4 months                      | 0.18                   | 0.19             | 0.27             | 0.57             | 4.23             | 4.87 | 0.27             | 0.28             | 0.31             | 0.66             | 4.21  | 12.1 |
| 8 months                      | 0.15                   | 0.16             | 0.21             | 0.49             | 2.21             | 3.71 | 0.23             | 0.24             | 0.28             | 0.64             | 3.56  | 10.2 |
| 12 months                     | 0.12                   | 0.12             | 0.14             | 0.26             | 1.07             | 1.79 | 0.18             | 0.19             | 0.23             | 0.53             | 2.67  | 8.23 |

<sup>1</sup> Assumed to receive 50:50 breastmilk and formula, see Appendix 1 and main text



**Table S6.** Sensitivity analysis comparing geometric mean (GM) estimated arsenic exposures ( $\mu\text{g kg}^{-1} \text{d}^{-1}$ ) for infants during the first year of life for different assumptions regarding the ingestion rate per unit body mass ( $\text{IR}_{\text{BW}}$ ) using the A) central tendency model and B) upper bound model.

A) Central Tendency Model

|                                                        | All  |          | Mixed |          | Formula-fed |          |
|--------------------------------------------------------|------|----------|-------|----------|-------------|----------|
|                                                        | GM   | % Change | GM    | % Change | GM          | % Change |
| <b>4 months</b>                                        |      |          |       |          |             |          |
| Main model <sup>a</sup>                                | 0.10 | Referent | 0.20  | Referent | 0.28        | Referent |
| Tap water arsenic <10 ppb <sup>b</sup>                 | 0.08 | -18%     | 0.14  | -29%     | 0.19        | -31%     |
| Tap water $\text{IR}_{\text{BW}}$ <sup>c</sup>         | 0.09 | -11%     | 0.17  | -17%     | 0.22        | -20%     |
| NHBCS $\text{IR}_{\text{BW}}$ for formula <sup>d</sup> | 0.11 | 7%       | 0.23  | 12%      | 0.32        | 13%      |
| <b>8 months</b>                                        |      |          |       |          |             |          |
| Main model                                             | 0.09 | Referent | 0.13  | Referent | 0.20        | Referent |
| Tap water arsenic <10 ppb                              | 0.07 | -23%     | 0.09  | -31%     | 0.14        | -31%     |
| Tap water $\text{IR}_{\text{BW}}$                      | 0.08 | -11%     | 0.11  | -14%     | 0.17        | -16%     |
| NHBCS $\text{IR}_{\text{BW}}$ for formula              | 0.09 | 3%       | 0.14  | 5%       | 0.21        | 5%       |
| <b>12 months</b>                                       |      |          |       |          |             |          |
| Main model                                             | 0.07 | Referent | 0.07  | Referent | 0.13        | Referent |
| Tap water arsenic <10 ppb                              | 0.06 | -23%     | 0.06  | -17%     | 0.09        | -30%     |
| Tap water $\text{IR}_{\text{BW}}$                      | 0.09 | 26%      | 0.09  | 29%      | 0.17        | 34%      |
| NHBCS $\text{IR}_{\text{BW}}$ for formula              | 0.09 | 27%      | 0.09  | 31%      | 0.17        | 36%      |

$\text{IR}_{\text{BW}}$  = Age specific, average body weight-adjusted ingestion rate<sup>1</sup>,  $\text{L kg}^{-1} \text{d}^{-1}$

B) Upper Bound Model

|                                                 | All  |          | Mixed |          | Formula-fed |          |
|-------------------------------------------------|------|----------|-------|----------|-------------|----------|
|                                                 | GM   | % Change | GM    | % Change | GM          | % Change |
| <b>4 months</b>                                 |      |          |       |          |             |          |
| Main model <sup>a</sup>                         | 0.22 | Referent | 0.37  | Referent | 0.51        | Referent |
| Tap water arsenic <10 ppb <sup>b</sup>          | 0.18 | -16%     | 0.27  | -26%     | 0.37        | -28%     |
| Tap water IR <sub>BW</sub> <sup>c</sup>         | 0.25 | 15%      | 0.47  | 27%      | 0.67        | 32%      |
| NHBCS IR <sub>BW</sub> for formula <sup>d</sup> | 0.25 | 16%      | 0.47  | 28%      | 0.68        | 33%      |
| <b>8 months</b>                                 |      |          |       |          |             |          |
| Main model                                      | 0.24 | Referent | 0.30  | Referent | 0.45        | Referent |
| Tap water arsenic <10 ppb                       | 0.19 | -20%     | 0.22  | -27%     | 0.33        | -28%     |
| Tap water IR <sub>BW</sub>                      | 0.27 | 13%      | 0.36  | 18%      | 0.55        | 22%      |
| NHBCS IR <sub>BW</sub> for formula              | 0.26 | 11%      | 0.35  | 15%      | 0.54        | 18%      |
| <b>12 months</b>                                |      |          |       |          |             |          |
| Main model                                      | 0.24 | Referent | 0.21  | Referent | 0.37        | Referent |
| Tap water arsenic <10 ppb                       | 0.19 | -20%     | 0.18  | -15%     | 0.27        | -27%     |
| Tap water IR <sub>BW</sub>                      | 0.33 | 37%      | 0.29  | 41%      | 0.55        | 50%      |
| NHBCS IR <sub>BW</sub> for formula              | 0.30 | 26%      | 0.27  | 28%      | 0.50        | 35%      |

IR<sub>BW</sub> = Age specific, average body weight-adjusted ingestion rate<sup>1</sup>, L kg<sup>-1</sup> d<sup>-1</sup>

<sup>a</sup>Applies the breast milk IR<sub>BW</sub> to all feeding types

<sup>b</sup>Restricts sample to infants in homes with tap water arsenic <10 ppb

<sup>c</sup>Applies tap water IR<sub>BW</sub> (reference [1]) to formula ingestion

<sup>d</sup>Applies formula IR<sub>BW</sub> calculated from NHBCS formula-fed infants to formula ingestion by formula-fed and mixed-fed infants.

**Table S7.** Sensitivity analysis comparing 95<sup>th</sup> percentile estimated arsenic exposures ( $\mu\text{g kg}^{-1} \text{d}^{-1}$ ) for infants during the first year of life for different assumptions regarding the ingestion rate per unit body mass ( $\text{IR}_{\text{BW}}$ ) using the A) central tendency model and B) upper bound model

A) Central Tendency Model

|                                                        | All      |          | Mixed    |          | Formula-fed |          |
|--------------------------------------------------------|----------|----------|----------|----------|-------------|----------|
|                                                        | 95 %tile | % Change | 95 %tile | % Change | 95 %tile    | % Change |
| <b>4 months</b>                                        |          |          |          |          |             |          |
| Main model <sup>a</sup>                                | 1.62     | Referent | 3.14     | Referent | 3.11        | Referent |
| Tap water arsenic <10 ppb <sup>b</sup>                 | 0.43     | 73%      | 0.67     | 79%      | 1.15        | 63%      |
| Tap water $\text{IR}_{\text{BW}}$ <sup>c</sup>         | 1.30     | 20%      | 2.53     | 20%      | 2.50        | 20%      |
| NHBCS $\text{IR}_{\text{BW}}$ for formula <sup>d</sup> | 1.84     | -13%     | 3.56     | -13%     | 3.53        | -13%     |
| <b>8 months</b>                                        |          |          |          |          |             |          |
| Main model                                             | 1.39     | Referent | 0.48     | Referent | 1.21        | Referent |
| Tap water arsenic <10 ppb                              | 0.43     | 69%      | 0.50     | -4%      | 0.78        | 36%      |
| Tap water $\text{IR}_{\text{BW}}$                      | 1.16     | 16%      | 0.64     | -34%     | 1.62        | -34%     |
| NHBCS $\text{IR}_{\text{BW}}$ for formula              | 1.46     | -5%      | 0.65     | -36%     | 1.65        | -36%     |
| <b>12 months</b>                                       |          |          |          |          |             |          |
| Main model                                             | 0.88     | Referent | 0.48     | Referent | 1.21        | Referent |
| Tap water arsenic <10 ppb                              | 0.29     | 67%      | 0.50     | -4%      | 0.78        | 36%      |
| Tap water $\text{IR}_{\text{BW}}$                      | 1.18     | -34%     | 0.64     | -34%     | 1.62        | -34%     |
| NHBCS $\text{IR}_{\text{BW}}$ for formula              | 1.20     | -36%     | 0.65     | -36%     | 1.65        | -36%     |

$\text{IR}_{\text{BW}}$  = Age specific, average body weight-adjusted ingestion rate<sup>1</sup>,  $\text{L kg}^{-1} \text{d}^{-1}$

B) Upper Bound Model

|                                                 | All      |          | Mixed    |          | Formula-fed |          |
|-------------------------------------------------|----------|----------|----------|----------|-------------|----------|
|                                                 | 95 %tile | % Change | 95 %tile | % Change | 95 %tile    | % Change |
| <b>4 months</b>                                 |          |          |          |          |             |          |
| Main model <sup>a</sup>                         | 2.24     | Referent | 4.23     | Referent | 4.21        | Referent |
| Tap water arsenic <10 ppb <sup>b</sup>          | 0.67     | 70%      | 0.67     | 84%      | 1.15        | 73%      |
| Tap water IR <sub>BW</sub> <sup>c</sup>         | 2.96     | -32%     | 5.56     | -31%     | 5.55        | -32%     |
| NHBCS IR <sub>BW</sub> for formula <sup>d</sup> | 2.99     | -33%     | 5.61     | -33%     | 5.61        | -33%     |
| <b>8 months</b>                                 |          |          |          |          |             |          |
| Main model                                      | 2.40     | Referent | 1.07     | Referent | 2.67        | Referent |
| Tap water arsenic <10 ppb                       | 0.78     | 68%      | 0.50     | 54%      | 0.78        | 71%      |
| Tap water IR <sub>BW</sub>                      | 2.92     | -22%     | 1.60     | -49%     | 4.02        | -50%     |
| NHBCS IR <sub>BW</sub> for formula              | 2.84     | -18%     | 1.43     | -34%     | 3.60        | -35%     |
| <b>12 months</b>                                |          |          |          |          |             |          |
| Main model                                      | 1.96     | Referent | 1.07     | Referent | 2.67        | Referent |
| Tap water arsenic <10 ppb                       | 0.70     | 64%      | 0.50     | 54%      | 0.78        | 71%      |
| Tap water IR <sub>BW</sub>                      | 2.95     | -50%     | 1.60     | -49%     | 4.02        | -50%     |
| NHBCS IR <sub>BW</sub> for formula              | 2.64     | -35%     | 1.43     | -34%     | 3.60        | -35%     |

IR<sub>BW</sub> = Age specific, average body weight-adjusted ingestion rate<sup>1</sup>, L kg<sup>-1</sup> d<sup>-1</sup>

<sup>a</sup>Applies the breast milk IR<sub>BW</sub> to all feeding types

<sup>b</sup>Restricts sample to infants in homes with tap water arsenic <10 ppb

<sup>c</sup>Applies tap water IR<sub>BW</sub> (reference [1]) to formula ingestion

<sup>d</sup>Applies formula IR<sub>BW</sub> calculated from NHBCS formula-fed infants to formula ingestion by formula-fed and mixed-fed infants.

**Figure S1.** Estimated arsenic exposure ( $\mu\text{g kg}^{-1} \text{d}^{-1}$ ) for NHBCS infants by feeding mode and age. using the A) central tendency model and B) upper bound model, which use central tendency or upper bound inputs, respectively, for the body-weight adjusted ingestion rate, infant formula powder, and breast milk. Variability between infants is due to individual-level concentrations of arsenic in home tap water and the change in feeding type over time. Colors indicate the different feeding types.

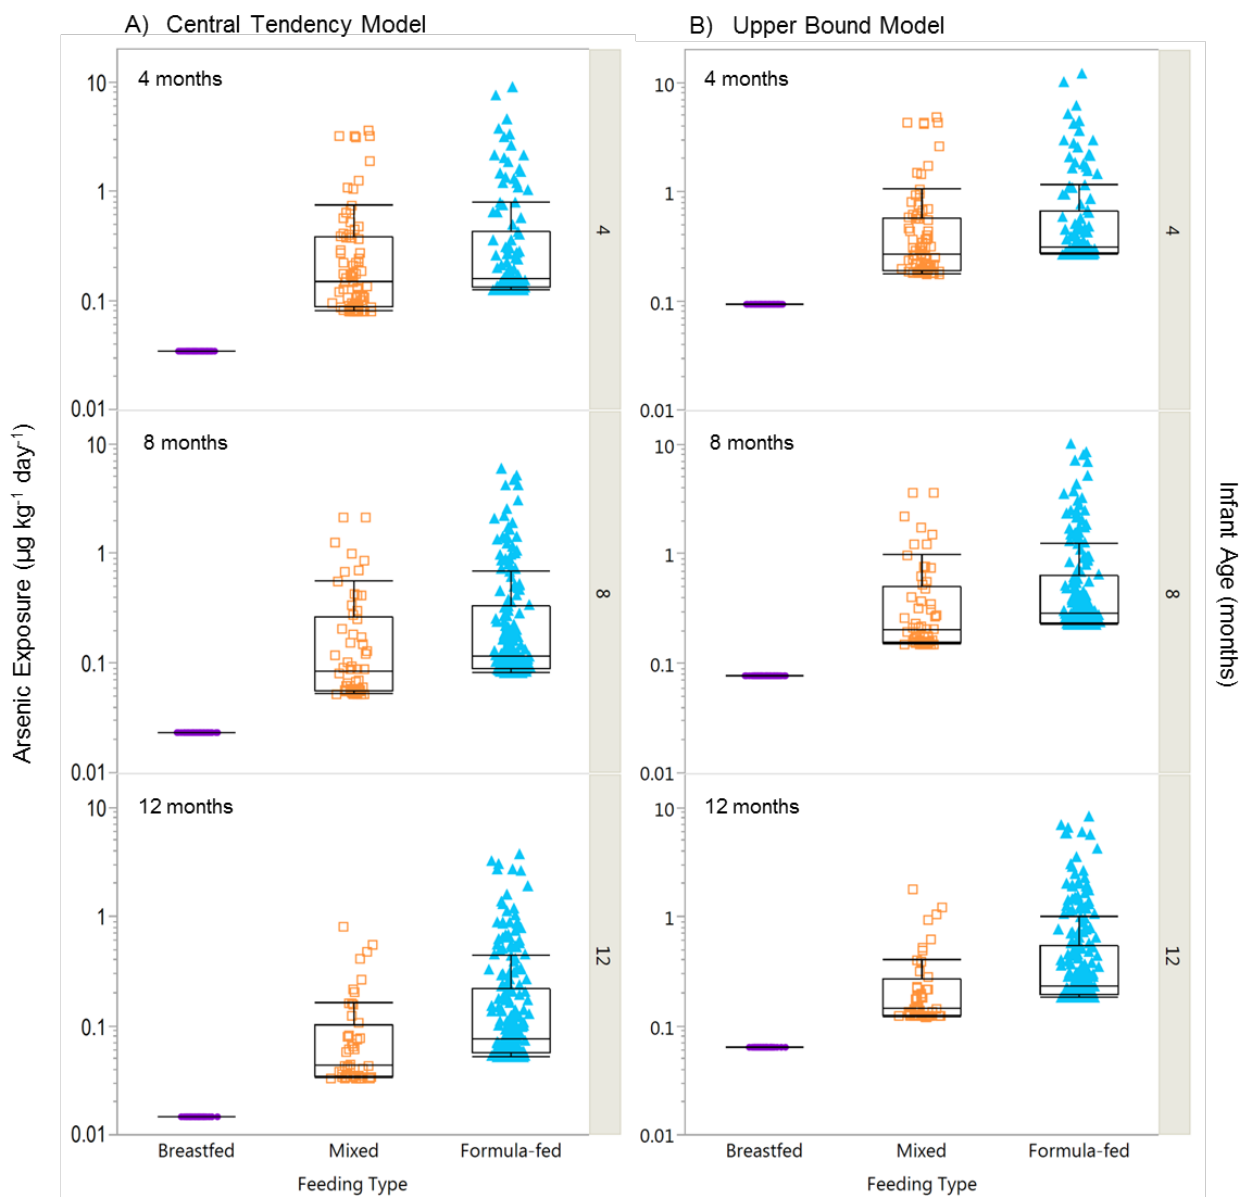

## REFERENCES

1. U.S. Environmental Protection Agency (US EPA). *Child-Specific Exposure Factors Handbook (Final Report)*. U.S. Environmental Protection Agency: Washington, D.C., 2008. <http://cfpub.epa.gov/ncea/cfm/recordisplay.cfm?deid=1992432008>.
2. Jackson BP, Taylor VF, Punshon T, Cottingham KL. Arsenic concentration and speciation in infant formulas and first foods. *Pure Appl Chem* 2012; 84: 215-224.
3. Carignan CC, Cottingham KL, Jackson BP, Farzan SF, Gandolfi AJ, Punshon T *et al.* Breastfed infants have lower exposure to arsenic compared to formula-fed infants in a United States cohort. *Environ Health Persp* 2015; 123: 500-506.
